# Supplementary material for: Genetic Analysis of HIBM Myopathy-Specific GNE V727M Hotspot Mutation Identifies a Novel COL6A3 Allied Gene Signature That Is Also Deregulated in Multiple Neuromuscular Diseases and Myopathies
Source: MDPI journal article supplement (doi:10.3390/genes14030567), 2023-02-24
Supplement: s1 [file s1]

### Primer details

| Cloning primers   | Forwarding primer (5'-3')                | Reveres primer (5'-3')                   |
|-------------------|------------------------------------------|------------------------------------------|
| GNE               | ATAAAAGCTTTAGGCCATGGAAACCTATGG           | ATAAGGATCCCTAGTAGATCCTGCG                |
|                   |                                          |                                          |
| SDM primers       | Forwarding primer (5'-3')                | Reveres primer (5'-3')                   |
| GNE SDM<br>_V727M | GTGCAGGACGTGGATATGGTGGTTTCGG<br>ATTTGTTG | CAACAAATCCGAAACCACCATATCCACG<br>TCCTGCAC |
|                   |                                          |                                          |
| qPCR primers      | Forwarding primer (5'-3')                | Reveres primer (5'-3')                   |
| GNRH2             | CTCTTCCTTGAGCAGCCATG                     | TAAGGGCATTCTGGGGATCC                     |
| PCP2              | GGATCAGGAGGAGAAGACGG                     | CTGTCACACGTTGGTCATCC                     |
| MSR1              | AGGACACTGATAGCTGCTCC                     | ACTGCAAACACGAGGAGGTA                     |
